# Supplementary material for: Copper inverse-9-metallacrown-3 compounds interacting with DNA
Source: Royal Society of Chemistry journal article supplement (doi:10.1039/b914112j), 2009-11-05
Supplement: b914112j.pdf [file b914112j.pdf]

## **SUPPLEMENTARY MATERIAL**

### **Copper inverse-9-Metallacrown-3 compounds interacting with DNA**

Tereza Afrati,<sup>1</sup> Anastasia A. Pantazaki<sup>3</sup>, Catherine Dendrinou-Samara,<sup>1</sup> Catherine Raptopoulou,<sup>2</sup> Aris Terzis,<sup>2</sup> Dimitris P. Kessissoglou<sup>1\*</sup>

<sup>1</sup>*Department of General and Inorganic Chemistry, Aristotle University of Thessaloniki, Thessaloniki, 54124, GREECE;* <sup>2</sup>*NCSR "Demokritos", Institute of Materials Science, 15310 Aghia Paraskevi Attikis, GREECE;* <sup>3</sup>*Laboratory of Biochemistry, Department of Chemistry, Aristotle University of Thessaloniki, Thessaloniki, 54124, GREECE*

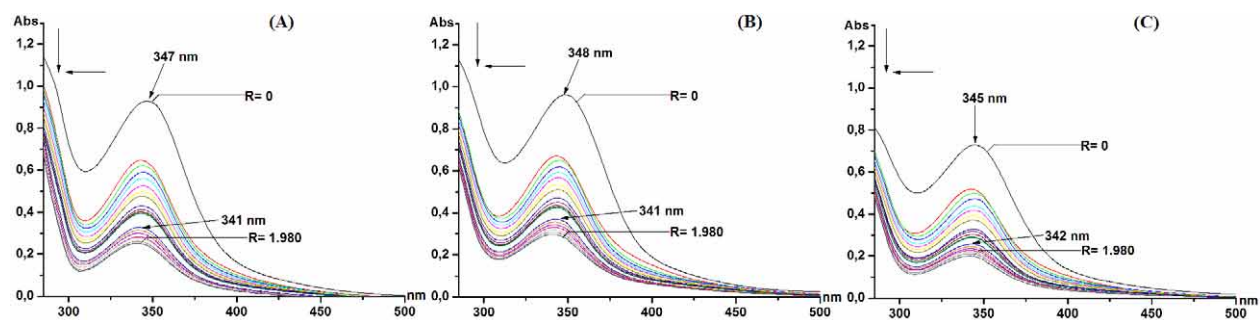

**Figure S1.** Absorption spectra in the UV region of  $[\text{Cu}_3(\text{PhPyCNO})_3(\text{OH})(2,4,5\text{-T})_2]$  (**2**) (A),  $[\text{Cu}_3(\text{PhPyCNO})_3(\text{OCH}_3)(\text{Cl})(\text{ClO}_4)]$  (**3**) (B) and  $[\text{Cu}_3(\text{PhPyCNO})_3(\text{OH})(\text{CH}_3\text{OH})_2(\text{ClO}_4)_2]$  (**4**) (C) in the absence and presence of increasing amounts of CT-DNA.  $[\text{complex}] = 2.5 \times 10^{-5}$  M,  $R = [\text{DNA}]/[\text{complex}]$ . Arrows show the absorbance changes upon increasing CT-DNA concentration.

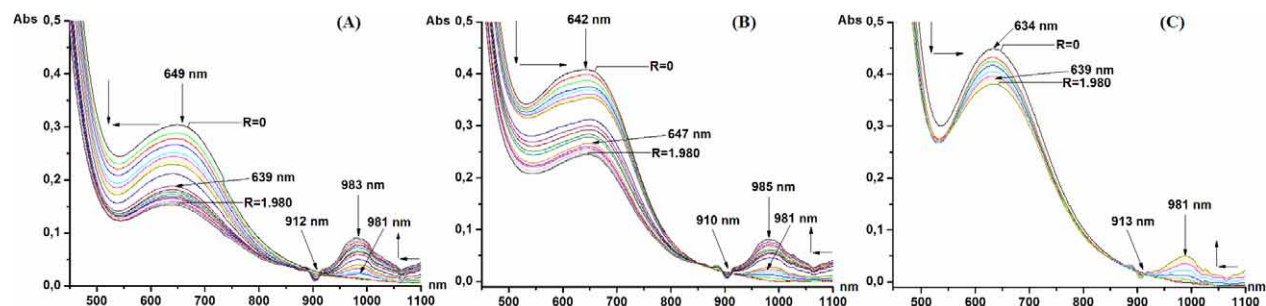

**Figure S2.** Absorption spectra in the Vis region of  $[\text{Cu}_3(\text{PhPyCNO})_3(\text{OH})(2,4,5\text{-T})_2]$  (**2**) (A),  $[\text{Cu}_3(\text{PhPyCNO})_3(\text{OCH}_3)(\text{Cl})(\text{ClO}_4)]$  (**3**) (B) and  $[\text{Cu}_3(\text{PhPyCNO})_3(\text{OH})(\text{CH}_3\text{OH})_2(\text{ClO}_4)_2]$  (**4**) (C) in the absence and presence of increasing amounts of CT-DNA.  $[\text{complex}] = 5 \times 10^{-4} \text{ M}$ ,  $R = [\text{DNA}]/[\text{complex}]$ . Arrows show the absorbance changes upon increasing CT-DNA concentration.

**Table S1.** Absorption spectroscopic properties of DNA binding to the copper(II) complexes **1**, **2**, **3** and **4**.

| <b>complex</b> | <b><math>\lambda_{\text{max}}</math> (nm)</b> | <b>blue shift (nm)</b> | <b>change in absorbance</b> | <b>H (%)</b> |
|----------------|-----------------------------------------------|------------------------|-----------------------------|--------------|
| <b>1</b>       | 260                                           | 4                      | Hyperchromism               | 41.32        |
| <b>2</b>       | 260                                           | 1                      | Hyperchromism               | 45           |
| <b>3</b>       | 260                                           | 3                      | Hyperchromism               | 41.18        |
| <b>4</b>       | 260                                           | 2                      | Hyperchromism               | 43.47        |
